# Supplementary material for: Nano-embedded microstructured FeS2@C as a high capacity and cycling-stable Na-storage anode in an optimized ether-based electrolyte
Source: Royal Society of Chemistry journal article supplement (doi:10.1039/c8ta07571a), 2018-01-01
Supplement: c8ta07571a1.pdf [file c8ta07571a1.pdf]

## Supporting Information

### **Nano-embedded microstructured FeS<sub>2</sub>@C as a high capacity and cycle-stable Na-storage anode with the optimized ether-based electrolyte**

*Min Zhou<sup>†</sup>, Hongwei Tao<sup>†</sup>, Kangli Wang,<sup>\*</sup> Shijie Cheng, Kai Jiang<sup>\*</sup>*

State Key Laboratory of Advanced Electromagnetic Engineering and Technology, School of Electrical and Electronic Engineering, Huazhong University of Science and Technology, Wuhan 430074, P. R. China.

<sup>†</sup> These authors contributed equally to this work

Corresponding Author: [kjiang@hust.edu.cn](mailto:kjiang@hust.edu.cn), [klwang@hust.edu.cn](mailto:klwang@hust.edu.cn)

## 1. X-ray photoelectron spectra of the FeS<sub>2</sub>@C

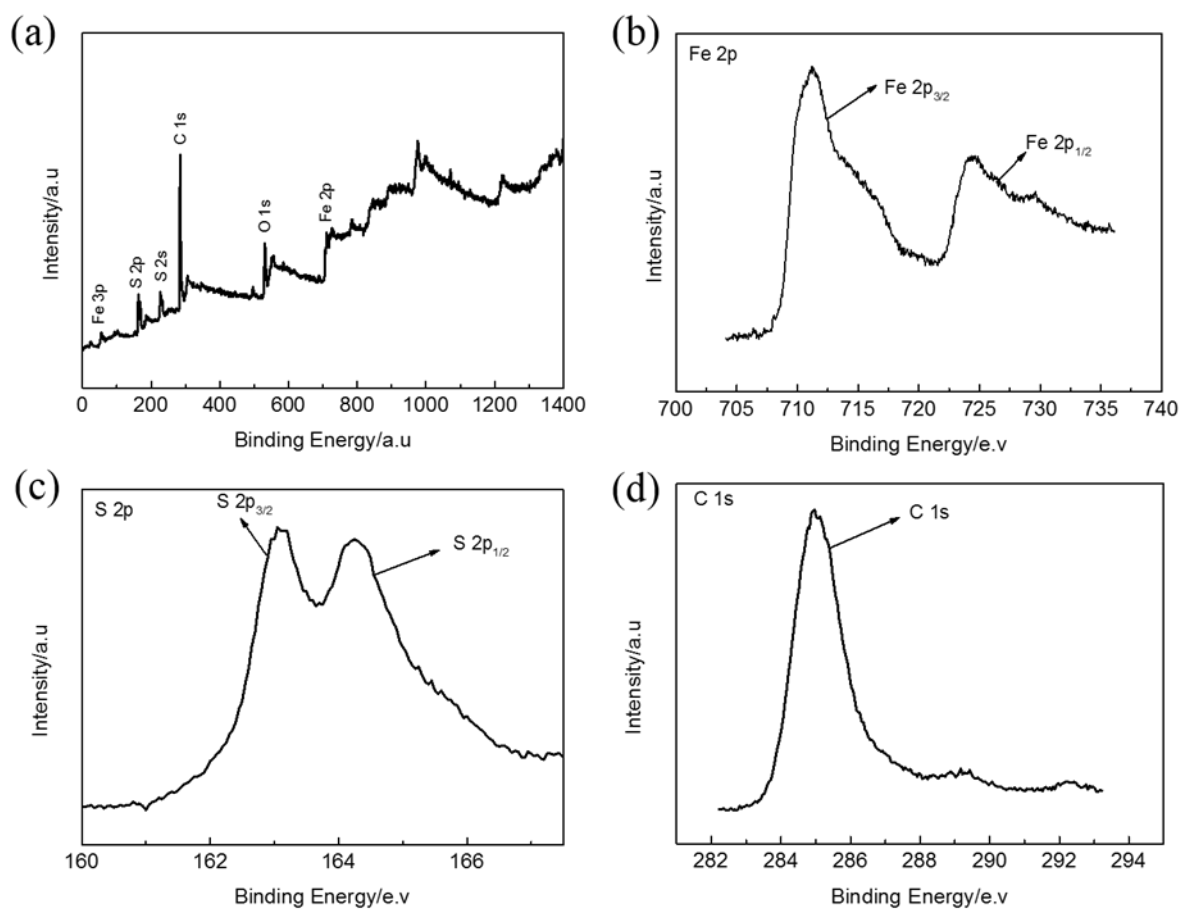

Fig. S1. Typical XPS spectra of the FeS<sub>2</sub>@C composite: (a) survey spectra, (b) high-resolution image of Fe 2p band, (c) high-resolution image of S 2p band, (d) high-resolution image of C 1s band

## 2. Thermogravimetric (TG) analysis of the FeS<sub>2</sub>@C

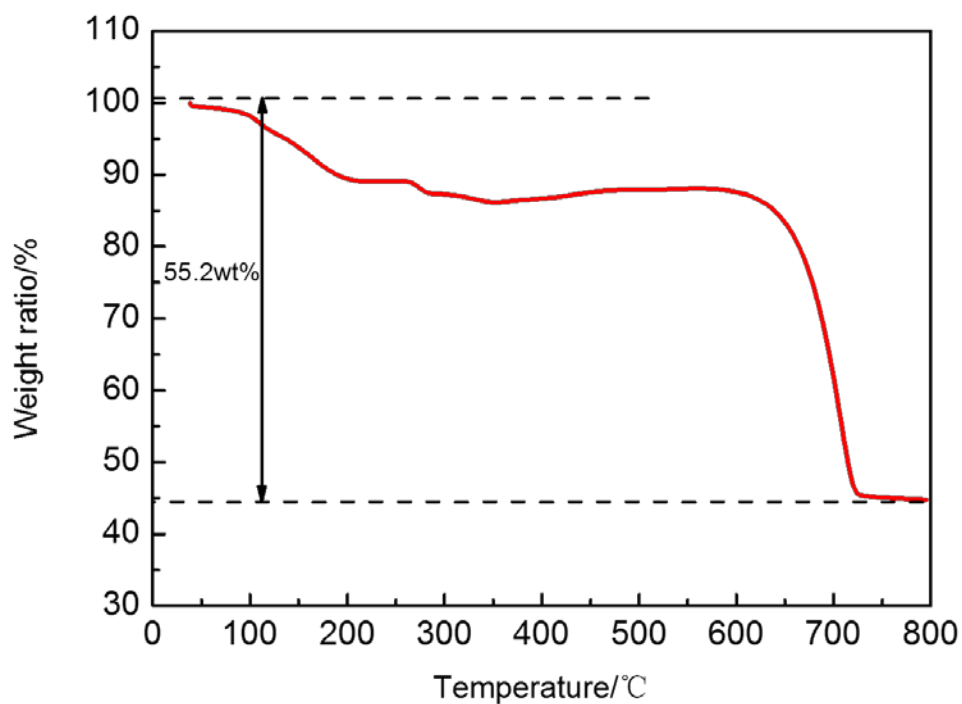

Fig. S2. TG curves of the FeS<sub>2</sub>@C composite

Under the air atmosphere, the FeS<sub>2</sub>@C experience the transformation of FeS<sub>2</sub> to Fe<sub>2</sub>O<sub>3</sub> and the oxidation of C. Taking into account of the weight loss of the former transformation, the contents of carbon is calculated to be 32.4%.

### 3. SEM images of the as-prepared FeS<sub>2</sub>@C

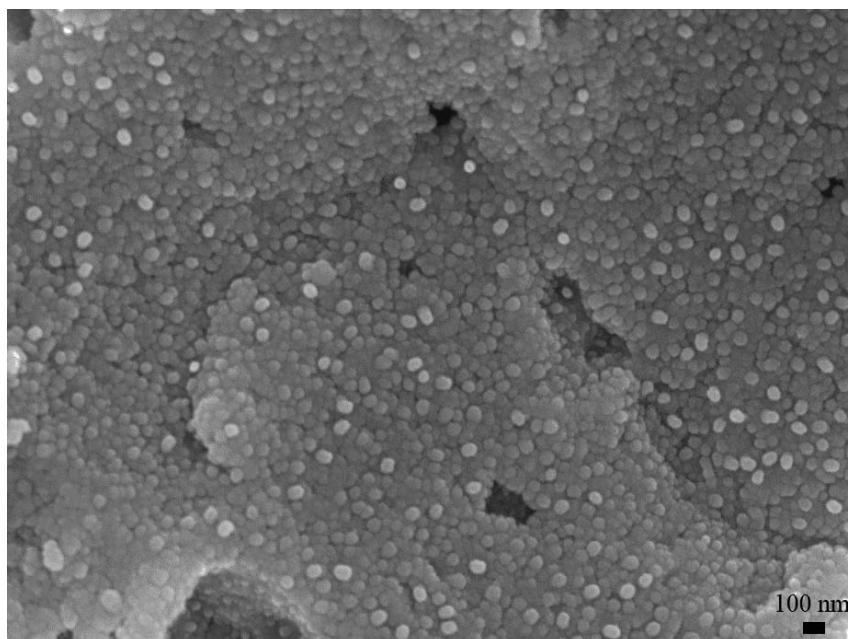

Fig. S3. SEM image of the as prepared FeS<sub>2</sub>@C

### 4. N<sub>2</sub> adsorption–desorption isotherm of the as-prepared FeS<sub>2</sub>@C

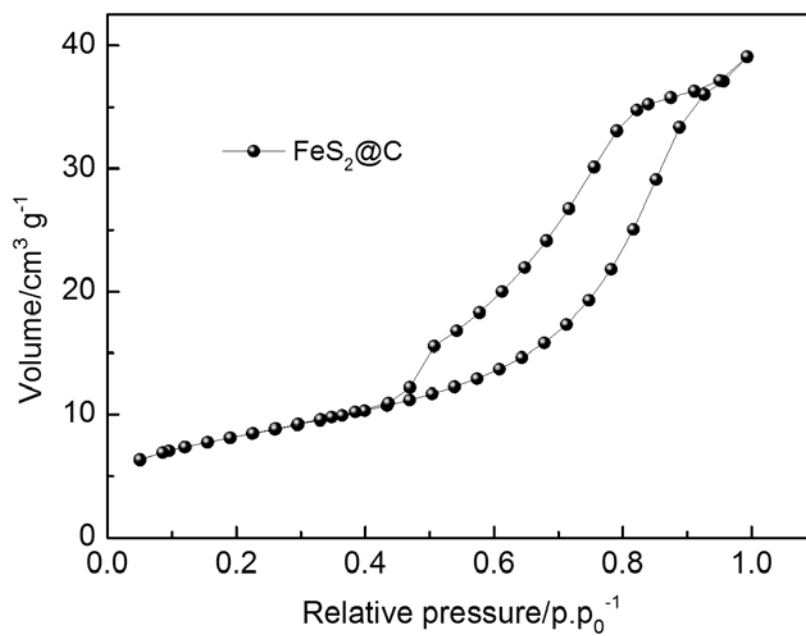

Fig. S4. N<sub>2</sub> adsorption–desorption isotherm of the as prepared FeS<sub>2</sub>@C

## 5. Cyclic voltammetry analysis of the FeS<sub>2</sub>@C in different ether- and ester-based electrolyte

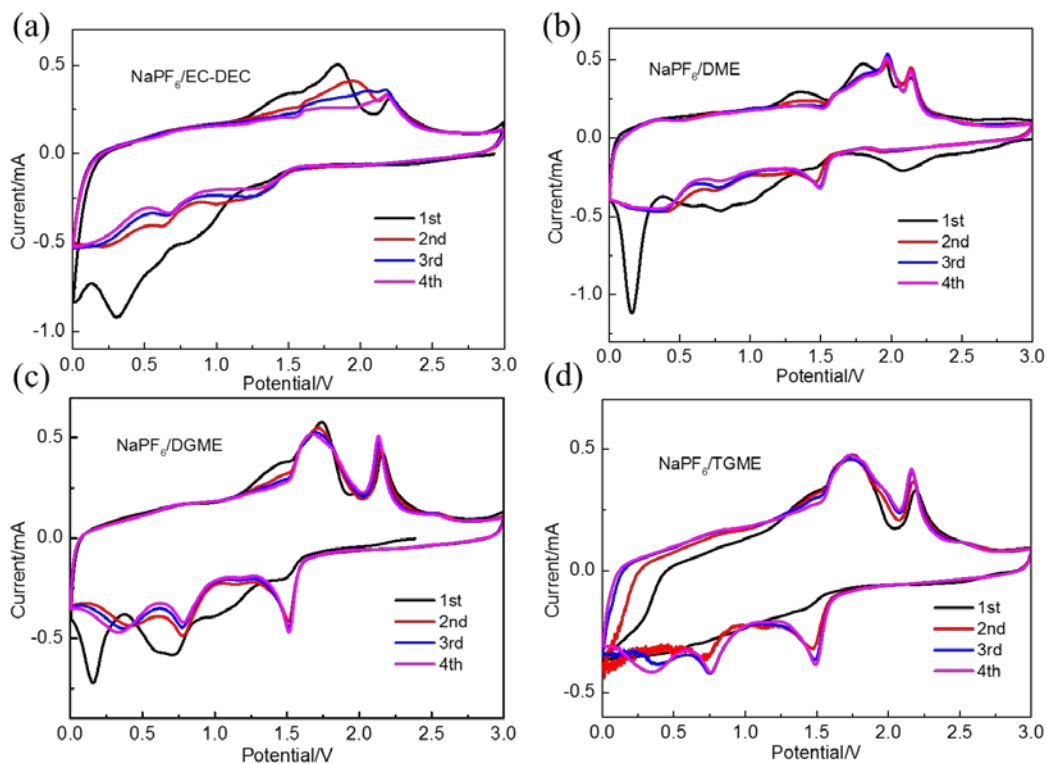

Fig. S5. CV curves of the as-prepared FeS<sub>2</sub>@C electrode in (a) NaPF<sub>6</sub>/EC-DEC; (b) NaPF<sub>6</sub>/DME; (c) NaPF<sub>6</sub>/DGME; (d) NaPF<sub>6</sub>/TGME. Scanning rates: 0.2 mV s<sup>-1</sup>; voltage range: 0.005 - 3 V

## 6. Cycling performances of the $\text{FeS}_2@\text{C}$ in the electrolytes with different solvents

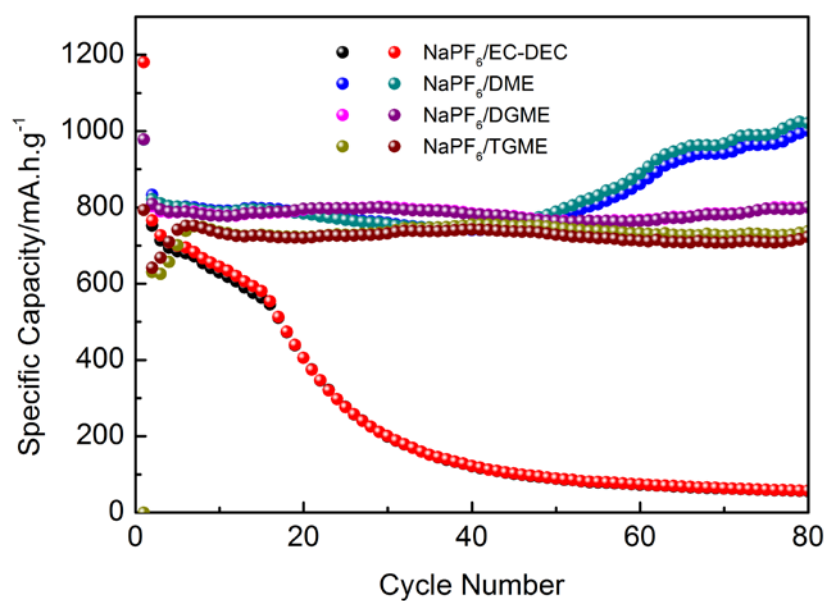

Fig. S6. Cycling performances of the  $\text{FeS}_2@\text{C}$  at  $0.5 \text{ A g}^{-1}$  in the electrolytes with different solvents:  $\text{NaPF}_6/\text{EC-DEC}$ ,  $\text{NaPF}_6/\text{DME}$ ,  $\text{NaPF}_6/\text{DGME}$ ,  $\text{NaPF}_6/\text{TGME}$ . Voltage range:  $0.005 \sim 3 \text{ V}$

## 7. The side reactions between carbonate solvents and polysulfide

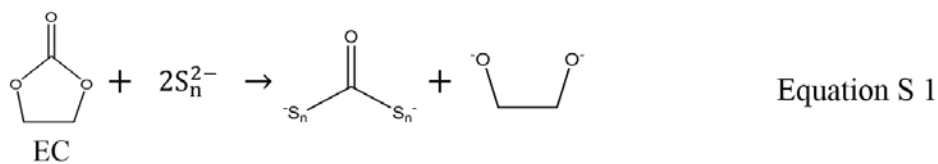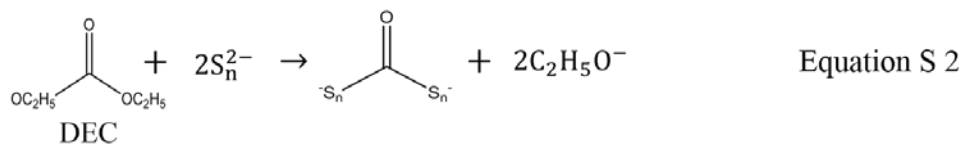

## 8. The Na storage performances of carbon in the electrolyte of NaPF<sub>6</sub>/DME.

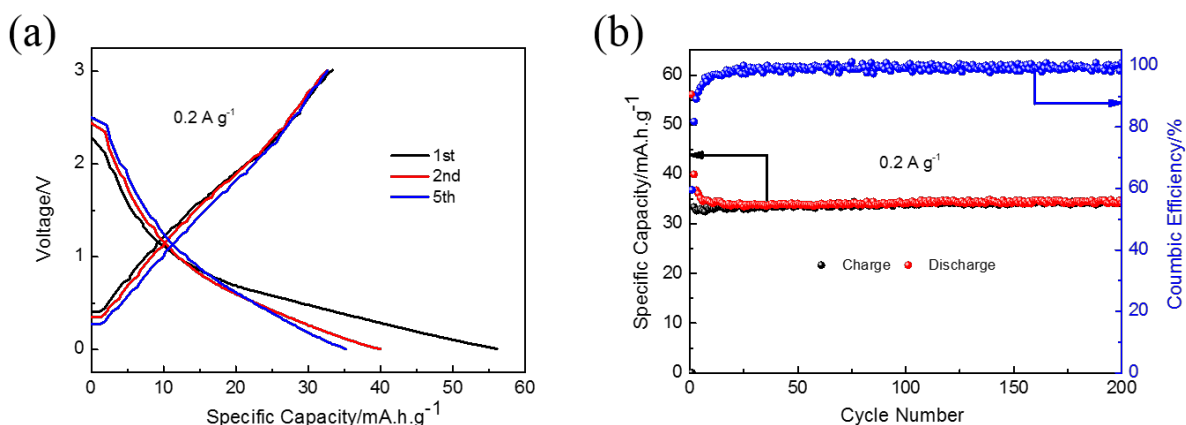

Fig. S7. (a) The charge-discharge profiles and (b) cycling performances of carbon derived from citric acid at 0.2 A g<sup>-1</sup>;

The carbon derived from citric acid can deliver a reversible capacity of 32 mAh g<sup>-1</sup>, respectively. As the carbon contents in the FeS<sub>2</sub>@C composite is 32.4%, the capacities contribution from carbon is 15 mAh g<sup>-1</sup>.

**9. Electrochemical impedance spectra (EIS) analysis of the FeS<sub>2</sub>@C at the charged state after the 1st and 30 th cycle in the electrolytes with different solvents and Na salts**

Table S1 Fitting results of the Nyquist plots of the FeS<sub>2</sub> electrode cycled in the electrolytes with different solvents

| Cycle | Samples             | R <sub>S</sub> (Ω) | R <sub>SEI</sub> (Ω) | CPE <sub>S</sub> (F) | R <sub>ct</sub> (Ω) | CPE <sub>dl</sub> (F) | Chi-Squared          |
|-------|---------------------|--------------------|----------------------|----------------------|---------------------|-----------------------|----------------------|
| 1 st  | B <sub>EC-DEC</sub> | 7.5                | 25.0                 | 2.2×10 <sup>-5</sup> | 14.8                | 2.0×10 <sup>-5</sup>  | 3.8×10 <sup>-3</sup> |
|       | B <sub>DME</sub>    | 5.7                | 1.3                  | 4.3×10 <sup>-7</sup> | 2.3                 | 1.1×10 <sup>-4</sup>  | 2.5×10 <sup>-3</sup> |
|       | B <sub>DGME</sub>   | 9.0                | 7.3                  | 3.4×10 <sup>-7</sup> | 9.2                 | 8.8×10 <sup>-4</sup>  | 1.5×10 <sup>-3</sup> |
|       | B <sub>TGME</sub>   | 21.8               | 14.5                 | 6.5×10 <sup>-6</sup> | 34.8                | 1.1×10 <sup>-4</sup>  | 6.6×10 <sup>-4</sup> |
| 30 th | B <sub>EC-DEC</sub> | 9.6                | 41.7                 | 1.9×10 <sup>-5</sup> | 346.4               | 2.6×10 <sup>-5</sup>  | 2.5×10 <sup>-4</sup> |
|       | B <sub>DME</sub>    | 5.0                | 0.6                  | 1.6×10 <sup>-6</sup> | 1.7                 | 1.8×10 <sup>-4</sup>  | 3.0×10 <sup>-3</sup> |
|       | B <sub>DGME</sub>   | 17.5               | 6.5                  | 7.8×10 <sup>-7</sup> | 8.7                 | 2.2×10 <sup>-4</sup>  | 3.5×10 <sup>-4</sup> |
|       | B <sub>TGME</sub>   | 8.4                | 13.7                 | 1.0×10 <sup>-4</sup> | 32.6                | 2.8×10 <sup>-5</sup>  | 7.8×10 <sup>-5</sup> |

Table S2 Fitting results of the Nyquist plots of the FeS<sub>2</sub> electrode cycled in the electrolytes with different Na salts

| Cycle | Samples                                     | R <sub>S</sub> (Ω) | R <sub>SEI</sub> (Ω) | CPE <sub>S</sub> (F) | R <sub>ct</sub> (Ω) | CPE <sub>dl</sub> (F) | Chi-Squared          |
|-------|---------------------------------------------|--------------------|----------------------|----------------------|---------------------|-----------------------|----------------------|
| 1st   | B <sub>NaClO<sub>4</sub></sub>              | 19.1               | 207.7                | 9.5×10 <sup>-5</sup> | 66.8                | 1.8×10 <sup>-4</sup>  | 1.6×10 <sup>-3</sup> |
|       | B <sub>NaCF<sub>3</sub>SO<sub>3</sub></sub> | 50.4               | 5.7                  | 6.9×10 <sup>-6</sup> | 42.1                | 3.2×10 <sup>-4</sup>  | 1.2×10 <sup>-3</sup> |
|       | B <sub>NaPF<sub>6</sub></sub>               | 5.7                | 1.3                  | 4.3×10 <sup>-7</sup> | 2.3                 | 1.1×10 <sup>-4</sup>  | 2.5×10 <sup>-3</sup> |
| 30th  | B <sub>NaClO<sub>4</sub></sub>              | 2.2                | 340.8                | 3.3×10 <sup>-4</sup> | 297.0               | 2.0×10 <sup>-5</sup>  | 3.0×10 <sup>-4</sup> |
|       | B <sub>NaCF<sub>3</sub>SO<sub>3</sub></sub> | 65.4               | 20.5                 | 2.1×10 <sup>-5</sup> | 181.2               | 1.9×10 <sup>-5</sup>  | 3.9×10 <sup>-4</sup> |
|       | B <sub>NaPF<sub>6</sub></sub>               | 5.0                | 0.6                  | 1.6×10 <sup>-6</sup> | 1.7                 | 1.8×10 <sup>-4</sup>  | 3.0×10 <sup>-3</sup> |

## 10. Cyclic voltammetry analysis of the $\text{FeS}_2@\text{C}$ in DME-based electrolyte with different Na salts

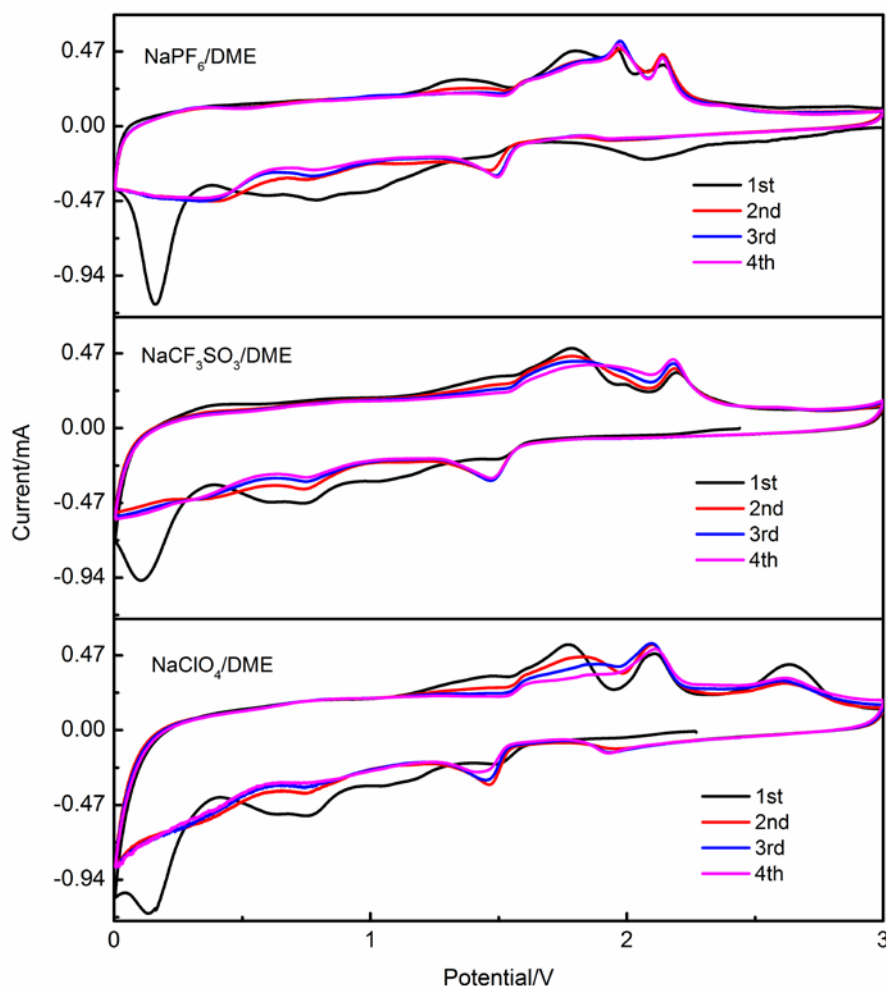

Fig. S8. CV curves of the as-prepared  $\text{FeS}_2@\text{C}$  electrode in DME-based electrolyte with different Na salts:  $\text{NaPF}_6/\text{DME}$ ,  $\text{NaCF}_3\text{SO}_3/\text{DME}$ ,  $\text{NaClO}_4/\text{DME}$ . Scanning rates:  $0.2 \text{ mV s}^{-1}$ ; voltage range: 0.005 - 3 V.

As shown in Fig. S8, in the CV curves of the electrode tested in  $\text{NaClO}_4/\text{DME}$ , there are obvious redox peaks located at 2.0/2.5 V, which cannot be observed in the CV curves of that in  $\text{NaSO}_3\text{CF}_3/\text{DME}$  and  $\text{NaPF}_6/\text{DME}$ . As the S/Fe mole ratios of the electrode obtained in  $\text{NaClO}_4/\text{DME}$  (1.06) is much lower than that of the pristine electrode, this peak can be ascribed to the redox reactions of the polysulfide which are dissolved in the electrolyte. While in  $\text{NaSO}_3\text{CF}_3/\text{DME}$  and  $\text{NaPF}_6/\text{DME}$ , the S/Fe mole ratios of the electrode is 1.39 and 1.95, so that the redox peaks located at 2.0/2.5 V are insignificant.

## 11. XPS characterizations on the surface of the FeS<sub>2</sub>@C electrode obtained in in DME-based electrolyte with different Na salts

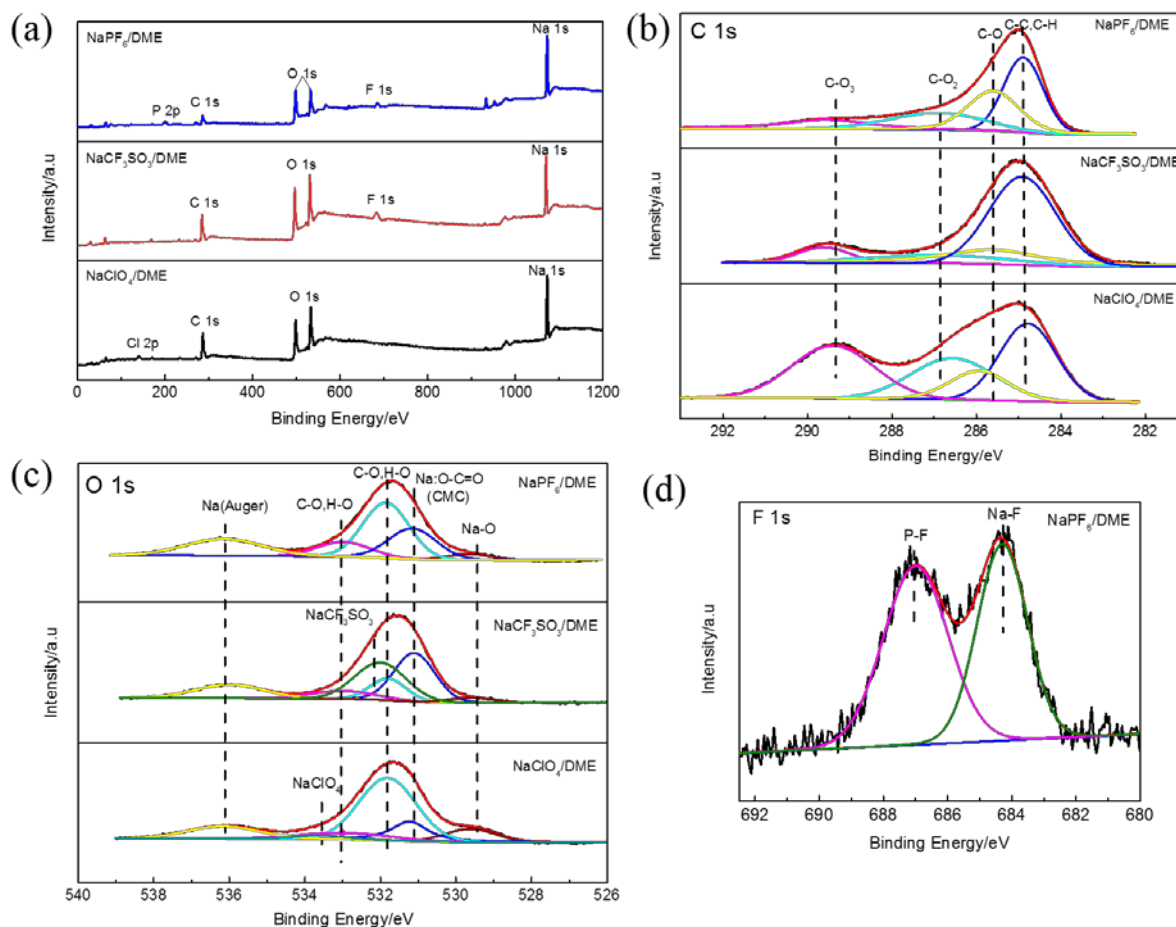

Fig. S9. Typical XPS spectra of the electrode cycled in NaPF<sub>6</sub>/DME, NaCF<sub>3</sub>SO<sub>3</sub>/DME and NaClO<sub>4</sub>/DME after the initial discharge process: (a) survey spectra, (b) high-resolution image of C 1s band, (c) high-resolution image of O 1s band, (d) high-resolution image of F 1s band.

As shown in the XPS spectra, the compounds in the SEI films formed in NaPF<sub>6</sub>/DME are mainly NaF, Na<sub>2</sub>CO<sub>3</sub>, Na<sub>2</sub>O, RCH<sub>2</sub>ONa, phosphates, et al. The SEI films formed in NaCF<sub>3</sub>SO<sub>3</sub>/DME are mainly composed of NaF, Na<sub>2</sub>CO<sub>3</sub>, Na<sub>2</sub>O, RCH<sub>2</sub>ONa, whereas those formed in the NaClO<sub>4</sub>/DME are composed of Na<sub>2</sub>CO<sub>3</sub>, Na<sub>2</sub>O, RCH<sub>2</sub>ONa and chlorates. It is noteworthy that the SEI films formed in NaPF<sub>6</sub>/DME show an increase in the NaF contents and decrease in the Na<sub>2</sub>CO<sub>3</sub> contents compared to that of NaCF<sub>3</sub>SO<sub>3</sub>/DME and NaClO<sub>4</sub>/DME.

## 12. Elemental contents of the electrodes analysis of the FeS<sub>2</sub>@C in DME-based electrolyte with different Na salts

Table S3 Elemental contents of the FeS<sub>2</sub>@C electrodes cycled in the DME-based electrolyte with NaClO<sub>4</sub>, NaCF<sub>3</sub>SO<sub>3</sub> and NaPF<sub>6</sub> after 30 cycles using XPS tester

| Sample                                      | Na(mol%) | F(mol%) | O(mol%) | C(mol%) | P(mol%) | Fe(mol%) | S(mol%) | S/Fe ratios |
|---------------------------------------------|----------|---------|---------|---------|---------|----------|---------|-------------|
| B <sub>NaClO<sub>4</sub></sub>              | 5.69     | 0.54    | 18.35   | 72.72   | 0.37    | 1.15     | 1.22    | 1.06        |
| B <sub>NaCF<sub>3</sub>SO<sub>3</sub></sub> | 6.19     | 0.74    | 18.68   | 69.11   | 0.4     | 2.06     | 2.86    | 1.39        |
| B <sub>NaPF<sub>6</sub></sub>               | 5.87     | 0.49    | 14.88   | 73.44   | 0.42    | 1.68     | 3.27    | 1.95        |

**13. The Na storage performances of the  $\text{FeS}_2\text{@C}$  in various ether-based electrolytes (DME, DGME, TGME) with different Na salts ( $\text{NaPF}_6$ ,  $\text{NaCF}_3\text{SO}_3$ ,  $\text{NaFSI}$ ,  $\text{NaTFSI}$ ,  $\text{NaClO}_4$ )**

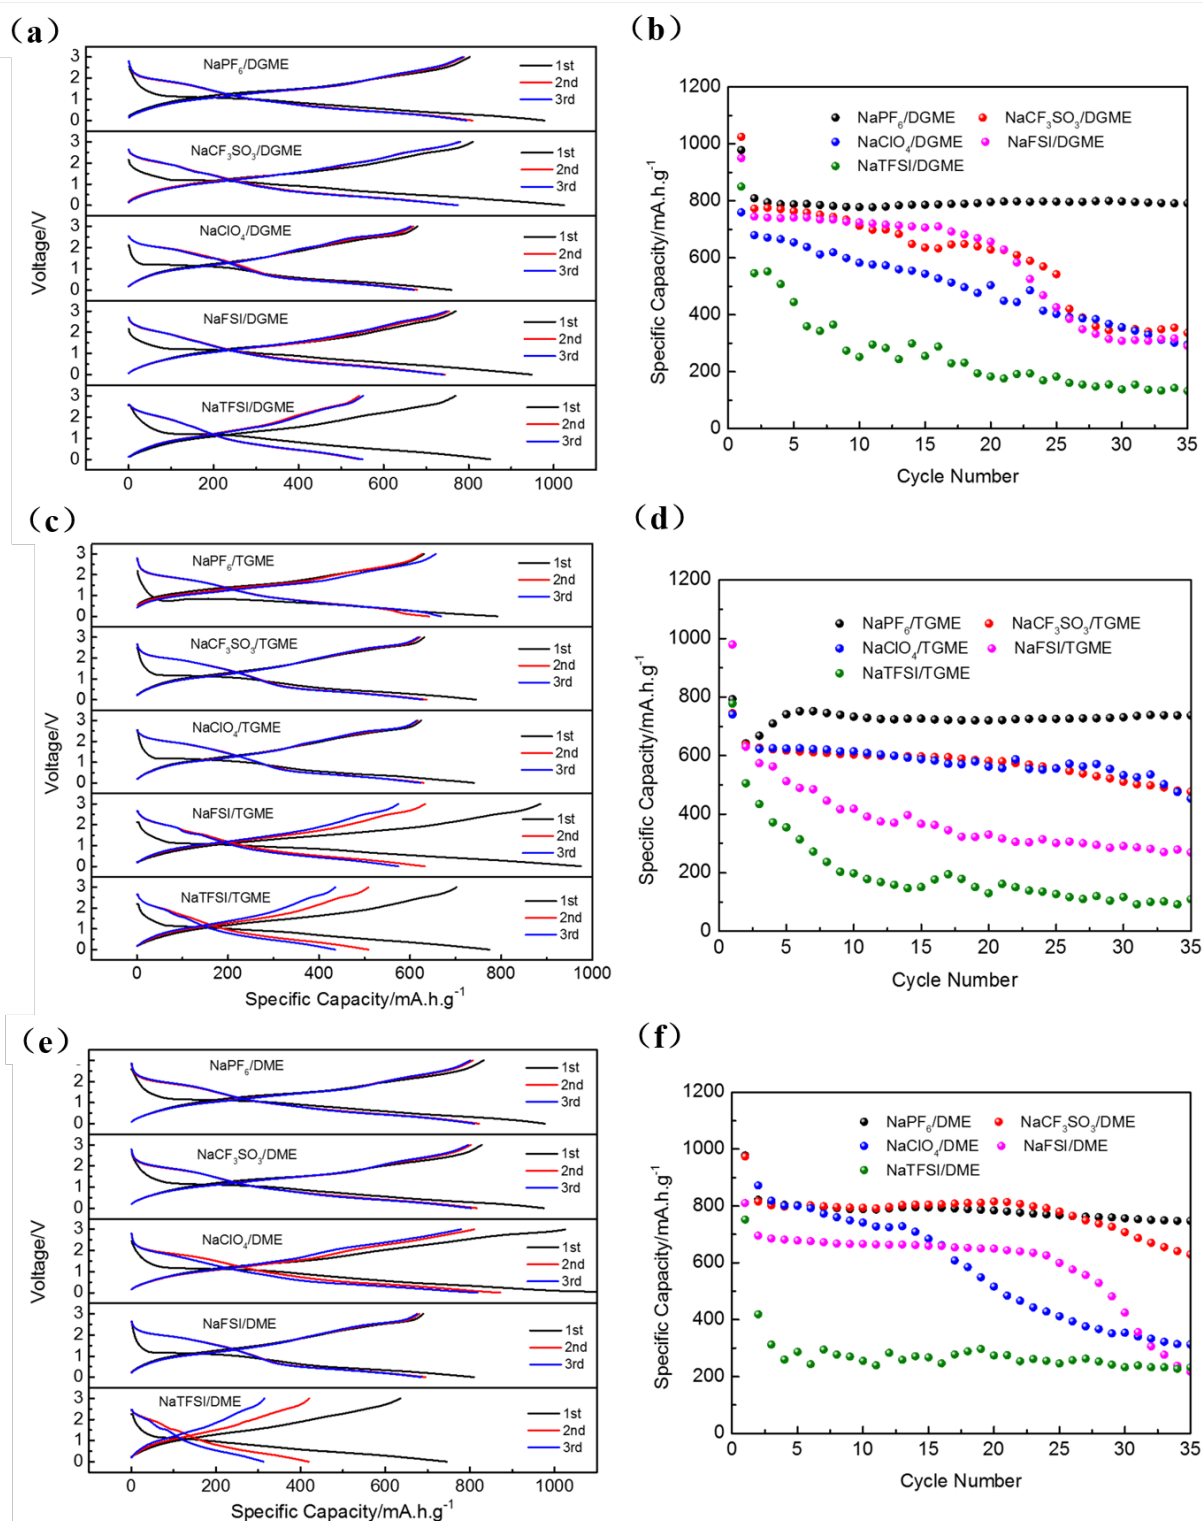

Fig. S10. Charge-discharge profiles of the  $\text{FeS}_2\text{@C}$  in DGME-based (a), TGME-based (c) and DME-based (e) electrolytes in the voltage range of 0.005~3 V; Comparison of the cycling performances of  $\text{FeS}_2\text{@C}$  in in DGME-based (b), TGME-based (d) and DME-based (f) electrolytes. Current density:  $500 \text{ mA g}^{-1}$ .

#### 14. Comparison of the Na storage performances in different electrolyte systems.

Table S4 Comparison of the Na storage performances of the FeS<sub>2</sub>@C electrodes in different electrolyte systems.

| Electrolyte                             | Initial<br>discharge/charge<br>capacity(mAh g <sup>-1</sup> ) | Initial<br>coulombic<br>efficiency(%) | Coulombic<br>efficiency<br>during<br>cycling(%) | Capacity<br>retention after<br>30 cycles(%) |
|-----------------------------------------|---------------------------------------------------------------|---------------------------------------|-------------------------------------------------|---------------------------------------------|
| NaPF <sub>6</sub> /EC+DEC               | 1180.8/752.1                                                  | 63.7                                  | 93.9                                            | 27.9                                        |
| NaPF <sub>6</sub> /DME                  | 977.8/832.5                                                   | 85.1                                  | 99.9                                            | 95.0                                        |
| NaPF <sub>6</sub> /DGME                 | 978.6/802.9                                                   | 82.0                                  | 99.8                                            | 98.6                                        |
| NaPF <sub>6</sub> /TGME                 | 793.2/630.7                                                   | 79.5                                  | 99.8                                            | 100                                         |
| NaClO <sub>4</sub> /DME                 | 1257.3/1025.2                                                 | 81.5                                  | 95.2                                            | 41.4                                        |
| NaClO <sub>4</sub> /DGME                | 759.2/679.6                                                   | 89.5                                  | 98.3                                            | 52.3                                        |
| NaClO <sub>4</sub> /TGME                | 740.6/624.5                                                   | 84.3                                  | 99.3                                            | 72                                          |
| NaCF <sub>3</sub> SO <sub>3</sub> /DME  | 974/827.9                                                     | 85.0                                  | 97.6                                            | 86.1                                        |
| NaCF <sub>3</sub> SO <sub>3</sub> /DGME | 1025.3/810.2                                                  | 79.0                                  | 99.5                                            | 45.6                                        |
| NaCF <sub>3</sub> SO <sub>3</sub> /TGME | 745.0/631.2                                                   | 84.7                                  | 99.4                                            | 74.9                                        |
| NaFSI/DME                               | 809.6/689.7                                                   | 85.2                                  | 98.7                                            | 62                                          |
| NaFSI/DGME                              | 950.0/770.3                                                   | 81.1                                  | 99.2                                            | 41.2                                        |
| NaFSI/TGME                              | 975.7/886.2                                                   | 90.8                                  | 99.6                                            | 46.2                                        |
| NaTFSI/DME                              | 745.3/636.1                                                   | 85.4                                  | 99.0                                            | 31                                          |
| NaTFSI/DGME                             | 851/769.1                                                     | 90.4                                  | 99.4                                            | 25.3                                        |
| NaTFSI/TGME                             | 774.2/702.2                                                   | 90.7                                  | 99.2                                            | 23.1                                        |

## 15. Ionic conductivity of different electrolytes

Table S5 Ionic conductivity of different electrolytes with different solvents and Na salts

| Sample                                    | Ionic conductivity ( $\mu\text{s cm}^{-1}$ ) |
|-------------------------------------------|----------------------------------------------|
| 1M NaPF <sub>6</sub> /DME                 | 12890                                        |
| 1M NaPF <sub>6</sub> /DGME                | 7320                                         |
| 1M NaPF <sub>6</sub> /TGME                | 2580                                         |
| 1M NaPF <sub>6</sub> /EC-DEC              | 8920                                         |
| 1M NaCF <sub>3</sub> SO <sub>3</sub> /DME | 2120                                         |
| 1M NaClO <sub>4</sub> /DME                | 1120                                         |

As shown in Table S4, 1M NaPF<sub>6</sub>/DME demonstrate the highest ionic conductivity of 12890  $\mu\text{s cm}^{-1}$ .

## 16. Na storage performances of the FeS<sub>2</sub>@C in NaPF<sub>6</sub>/DME.

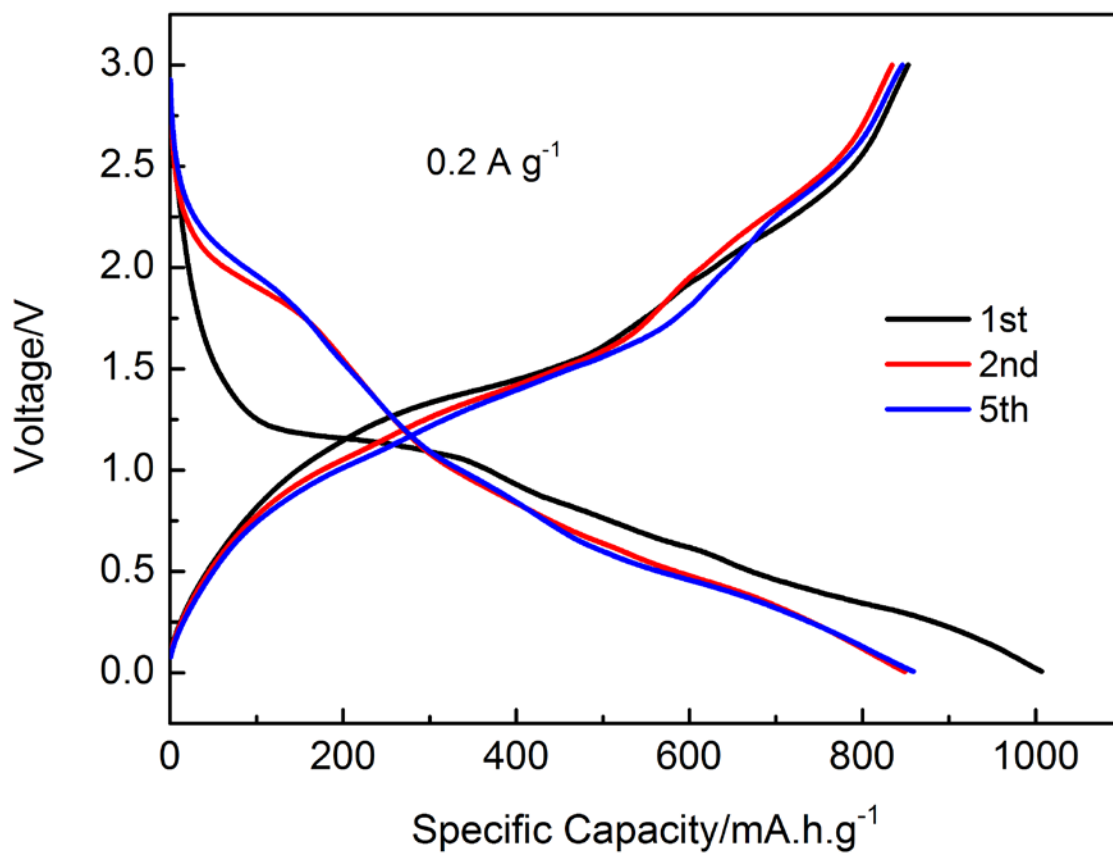

Fig. S11 Charge-discharge profiles of the FeS<sub>2</sub>@C in NaPF<sub>6</sub>/DME at 0.2 A g<sup>-1</sup>. Voltage range: 0.005 ~ 3 V.

At the current density of 0.2 A g<sup>-1</sup>, the FeS<sub>2</sub>@C deliver an initial charge/discharge capacity of 1007.5 /853 mAh g<sup>-1</sup>, corresponding to the initial coulombic efficiency of 84.7%.

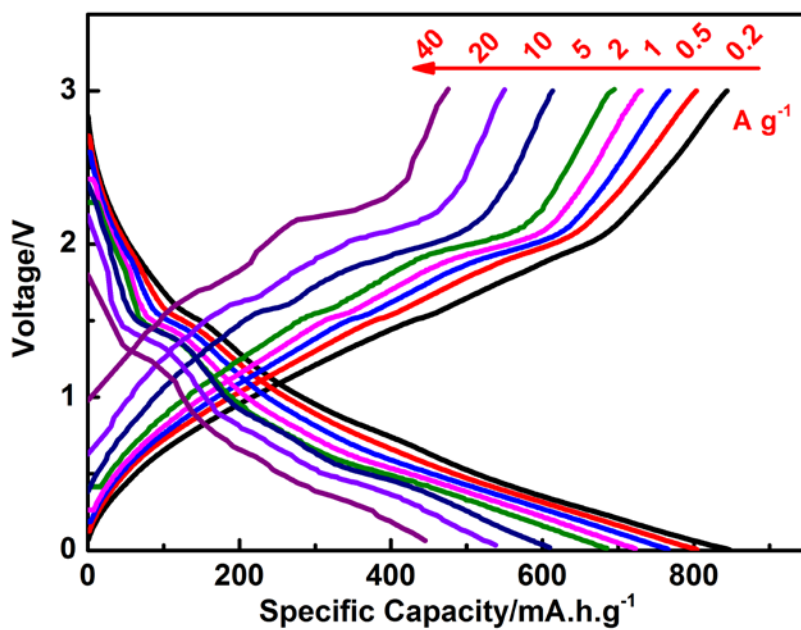

Fig. S12 Charge-discharge profiles of the  $\text{FeS}_2\text{@C}$  in  $\text{NaPF}_6/\text{DME}$  at different current densities from 0.2 to  $40 \text{ A g}^{-1}$ . Voltage range: 0.005 ~ 3 V.

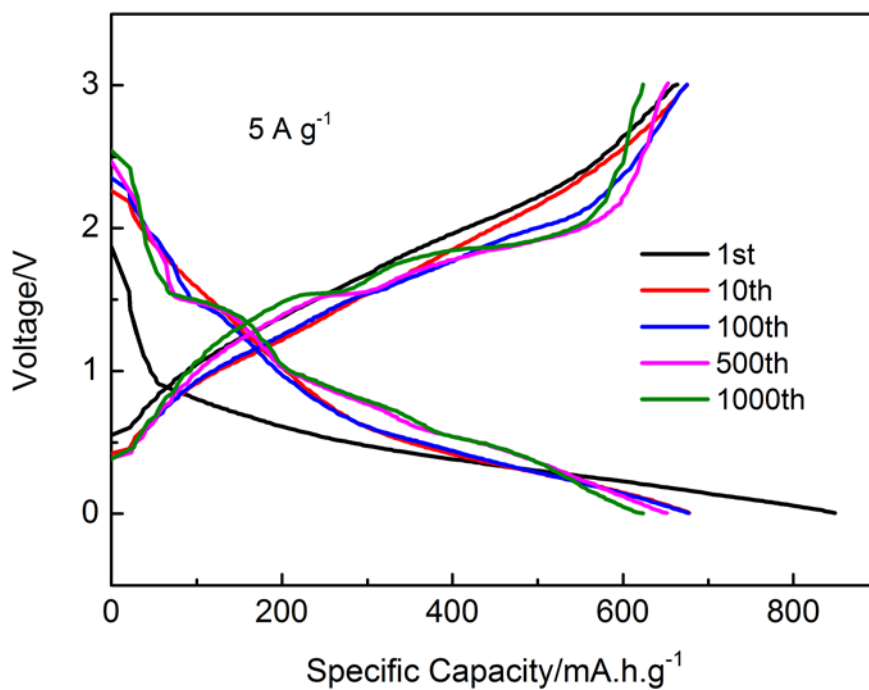

Fig. S13 Charge-discharge profiles of the  $\text{FeS}_2\text{@C}$  in  $\text{NaPF}_6/\text{DME}$  at  $5 \text{ A g}^{-1}$  of different cycles. Voltage range: 0.005 ~ 3 V.

## 17. Na storage performances of the FeS<sub>2</sub> without carbon.

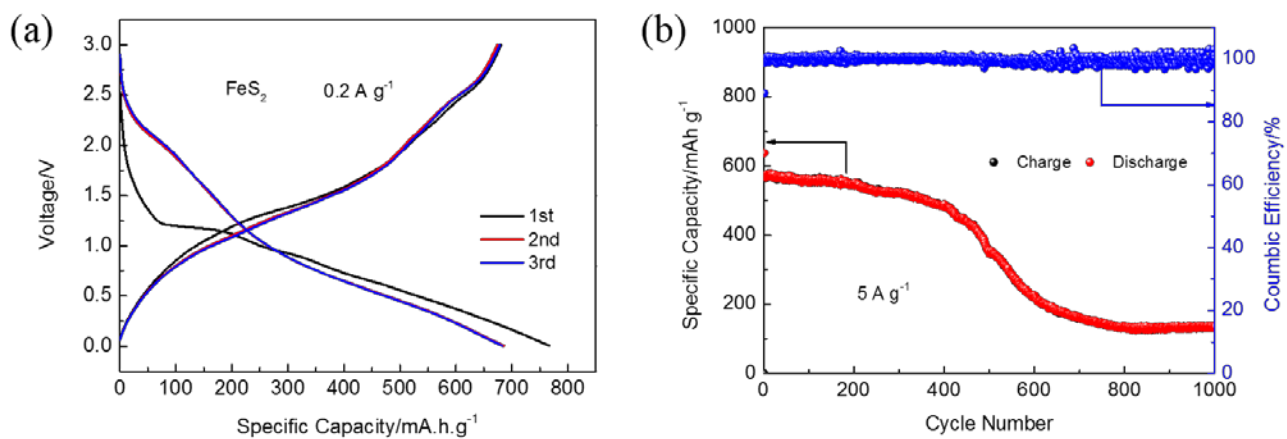

Fig. S14 (a) Charge-discharge profiles of the FeS<sub>2</sub> in NaPF<sub>6</sub>/DME at 0.2 A g<sup>-1</sup>; (b) cycling performances of FeS<sub>2</sub> at 5 A g<sup>-1</sup>: voltage range: 0.005 ~ 3 V.

**18. SEM and TEM images of FeS<sub>2</sub>@C electrode after different cycles at the fully charged state.**

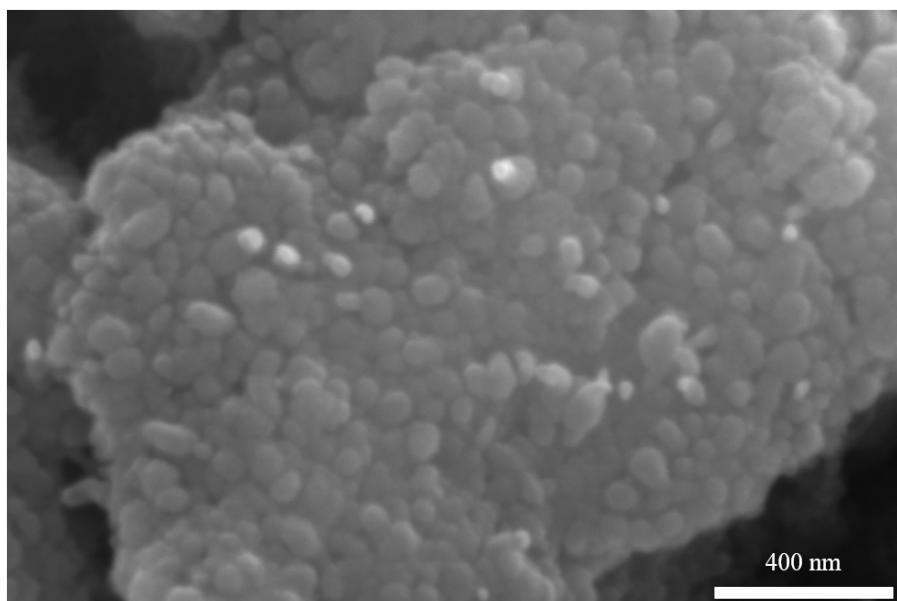

Fig. S15. SEM images of FeS<sub>2</sub>@C electrode at the fully charged state after 1000 cycles

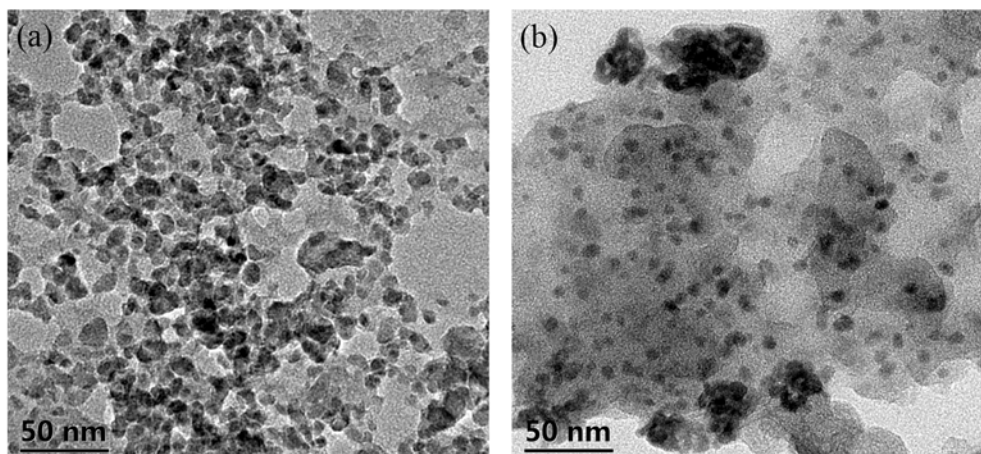

Fig. S16. TEM images of FeS<sub>2</sub>@C electrode at the fully charged state: (a) pristine electrode, (b) electrode cycled after 1000 cycles
